# Supplementary material
Source: PubMed Central journal article supplement (PMC7044048)
Supplement: NIHMS1542728-supplement-1.pdf [file NIHMS1542728-supplement-1.pdf]

## SUPPLEMENTAL INFORMATION

## SUPPLEMENTAL FIGURES

## Supplemental Figure 1

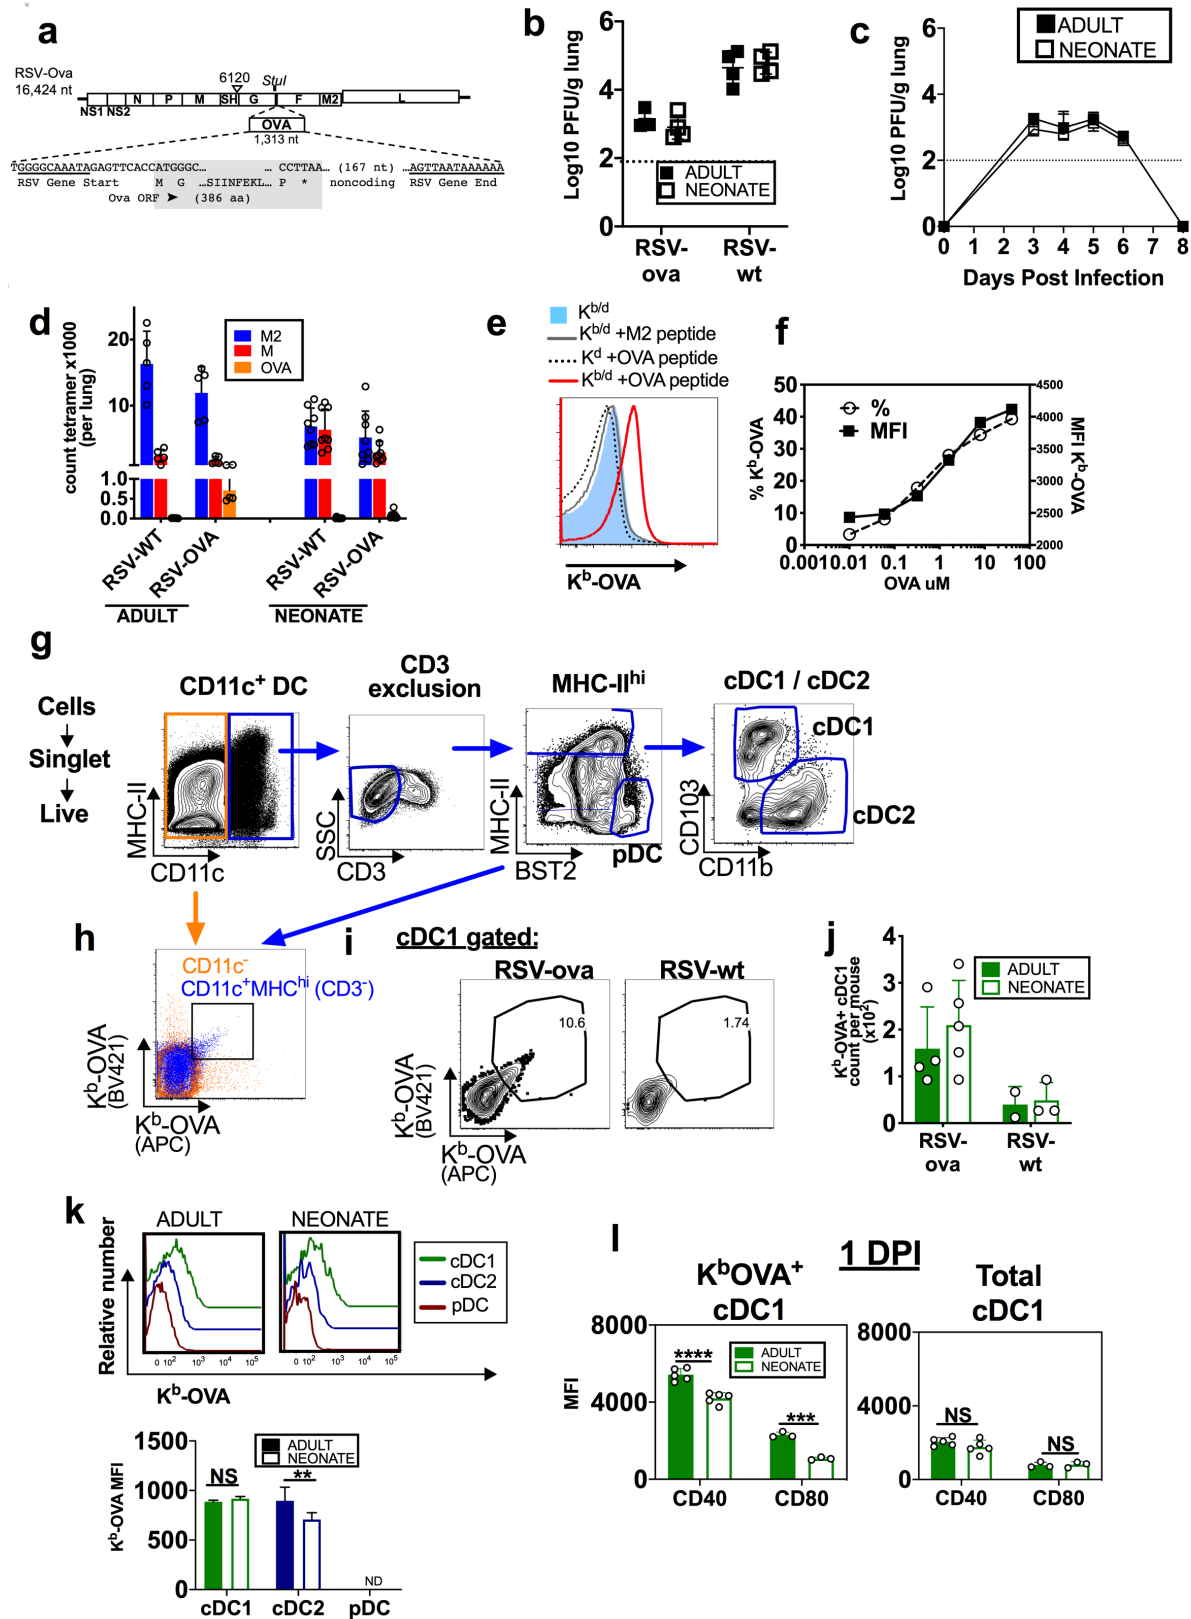

**Supplemental Fig. 1 Presentation of pathogen-specific MHC-I restricted antigen can be tracked *in vivo* with RSV-ova model a.** Schematic overview of the genome organization of RSV-ova: a recombinant version of RSV A2 expressing chicken ovalbumin from an additional gene, inserted between the RSV G and F genes. A 1,313 nucleotide (nt) insert containing a 1,289 nt fragment of the chicken ovalbumin mRNA (Ova, ORF shaded in gray; Genbank Accession number V00383.1), framed by RSV gene start and gene end signals (*underlined*), was inserted into the “6120” version of an RSV full length cDNA plasmid<sup>49</sup>, using a unique *Stu*I restriction site located in the RSV G/F intergenic region<sup>50</sup>; aa, amino acids. See Supplemental Methods for further details. **b** Viral titer of RSV-ova or RSV-wt from the lung of infected mice at 4 DPI measured by plaque assays (see Methods for details). **c** Kinetics of RSV-ova viral titer as measured by plaque assay in neonatal and adult mice from 0-8 DPI. Dashed line indicates limit of detection. **d** Numbers of epitope-specific CD8<sup>+</sup> T cells identified by tetramer staining from the lungs of adult and neonatal mice 7 days post RSV-wt or RSV-ova infection. **e** Naïve splenocytes were pulsed *in vitro* with different conditions: H-2K<sup>b/d</sup> haplotype splenocytes with M2<sub>82-90</sub> peptide (matched haplotype/mismatched peptide); K<sup>d</sup> splenocytes with OVA<sub>257-264</sub> peptide (mismatched haplotype/matched peptide); K<sup>b/d</sup> splenocytes with OVA<sub>257-264</sub> (matched haplotype/matched peptide), and stained with the monoclonal antibody 25-D1.16 (anti-K<sup>b</sup>-OVA) to show specificity of the antibody. **f** Splenocytes with H-2K<sup>b</sup> haplotype were pulsed with varying concentrations of OVA<sub>257-264</sub> peptide (SIINFEKL) to show the dose dependency of the binding of the monoclonal antibody 25-D1.16 (anti-K<sup>b</sup>-OVA). **g** Flow cytometric analysis and gating strategy of murine respiratory DC subsets in the dLN. Cell gate is based on forward versus side scatter to eliminate debris, followed by a singlet gate with forward scatter on both axes comparing height and area, followed by a live gate with side scatter versus the fluorescence of the viability dye to eliminate dead cells. **h, i** DC subsets were analyzed for K<sup>b</sup>-OVA expression by staining with two K<sup>b</sup>-OVA antibodies with the same specificity, but labeled with two distinct fluorochromes to improve accuracy of identifying rare cell populations. Resulting diagonal staining events indicate cells that equally bound both antibodies and therefore were likely to be presenting K<sup>b</sup>-OVA, while those binding a single antibody represent background staining. **h** Analysis of K<sup>b</sup>-OVA expression on CD11c<sup>-</sup> cells from the dLN that typically have limited ability to cross-present demonstrates absence of double staining. Gating of CD11c<sup>+</sup> CD3<sup>-</sup> cells demonstrates that nearly all cells double positive for K<sup>b</sup>-OVA staining are within this population. **i** Mice infected with RSV-wt were used as a negative control to confirm K<sup>b</sup>-OVA staining in every experiment. **j** Cell count of K<sup>b</sup>-OVA positive cells from the dLN in RSV-ova or RSV-wt infected mice at 2 DPI. **k** Mean fluorescence intensity (MFI) of K<sup>b</sup>-OVA expression on DC subsets from the dLN 2 DPI represented as histograms and as a bar graph. **l** Expression of costimulatory molecules (by MFI) on K<sup>b</sup>-OVA expressing or total cDC1s from the dLN 1 DPI. **b, c** Four mice per group, indicated as individually plotted points or as a single average point. **j, k, l** 3-6 mice pooled per sample, 4-5 samples

per group. Data are representative of two or three experiments. Data were analyzed using multiple *t*-tests (k), or two-way ANOVA with Sidak's multiple comparisons test (I). \*\*\*\* $p < 0.00001$ , \*\* $p < 0.001$ , NS=not significant

Supplemental Figure 2

**a**

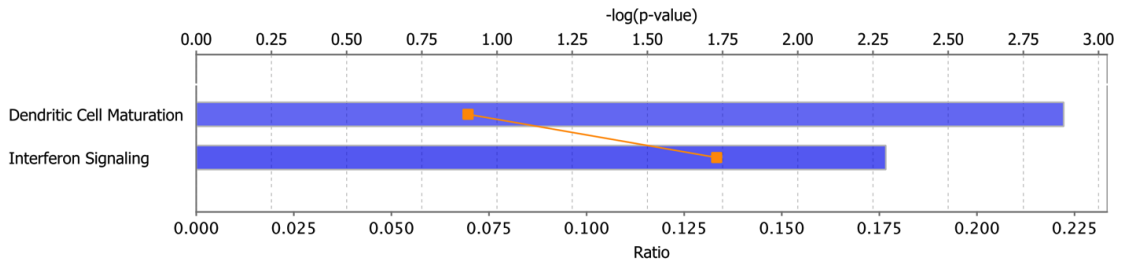

**b**

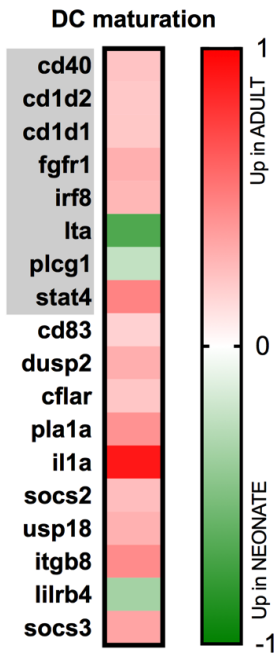

**c**

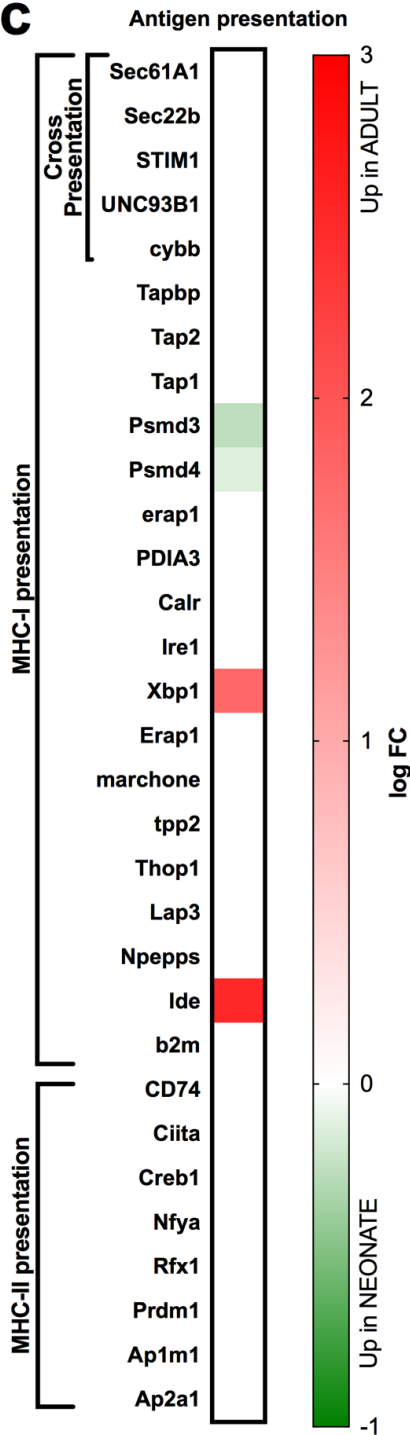

**Supplemental Fig. 2 RNA-seq analysis of K<sup>b</sup>-OVA-enriched cDC1s.** **a** Pathway analysis of DEG from adult compared to neonatal K<sup>b</sup>-OVA-enriched cDC1s (isolated from the dLN 2DPI) using QIAGEN Ingenuity Pathway Analysis software. The bars represent the ratio of the number of genes in the data set analyzed versus the total number of genes associated with the pathway. The point shows the  $-\log$  of the p value for each individual pathway. **b, c** Heatmaps are based on RNA-seq data as described in **a**. Data are shown as log fold-change ( $\text{Log}_{FC}$ ) of adult to neonatal genes expressed during dendritic cell maturation (**b**) and required for antigen processing and presentation (**c**). Genes marked in grey were identified by IPA analysis. Genes not shaded in grey were identified from the literature to expand upon the pathway highlight by IPA (**b**). Antigen presentation genes were not differentially expressed between neonatal and adult K<sup>b</sup>-OVA<sup>+</sup> cDC1s and was not a pathway identified by IPA supporting the similar expression of K<sup>b</sup>-OVA between the two age groups (**c**).

Supplemental Figure 3

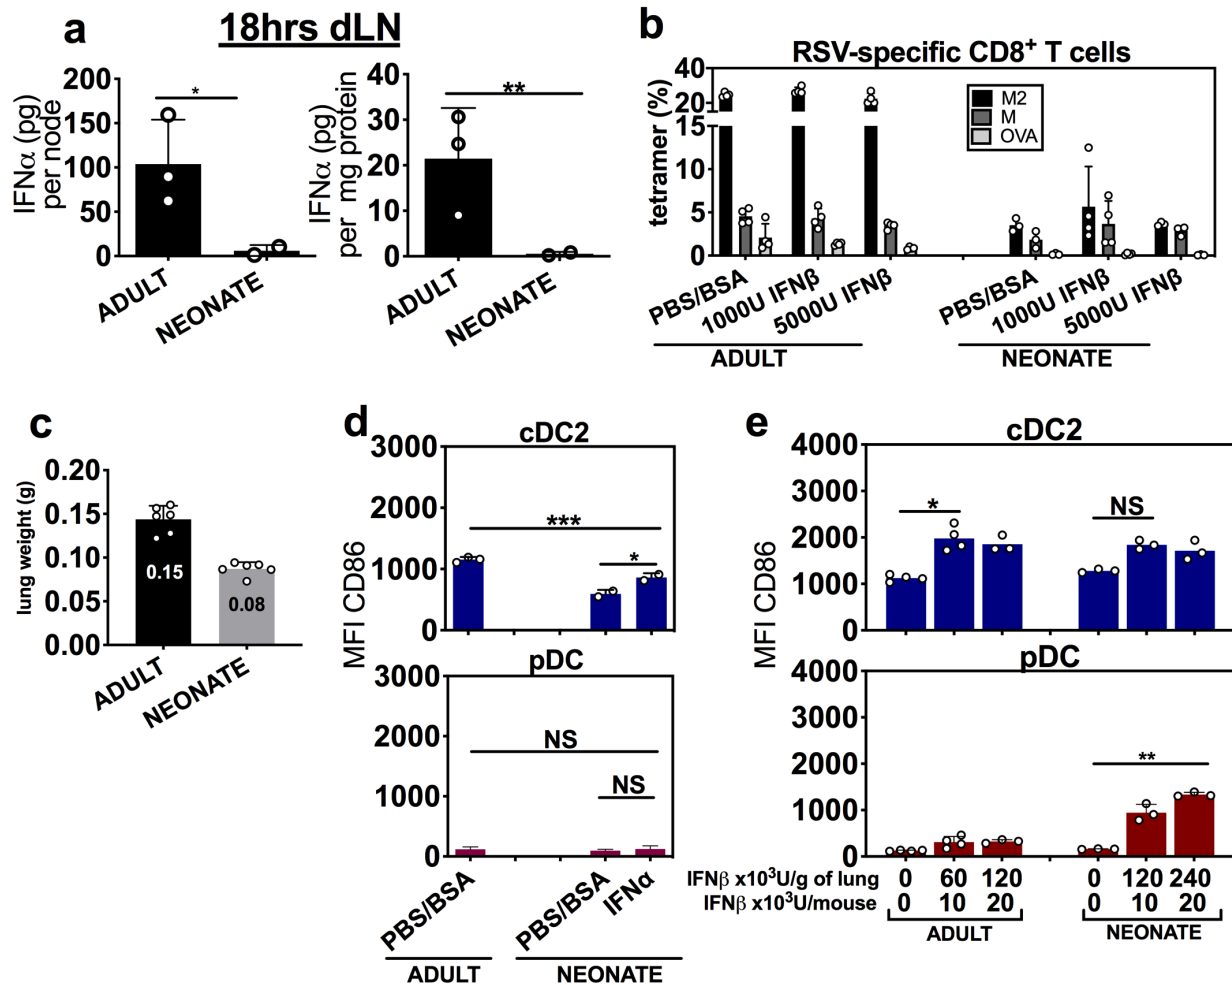

**Supplemental Fig. 3 IFN-I production during RSV-ova infection and responsiveness of immune cells to exogenous IFN-I administration.** **a** IFN $\alpha$  in the dLN was quantified by ELISA at 18 hours post RSV-ova infection. **b** Effect of exogenous IFN $\beta$  given intranasally 8 and 24 hours post RSV-ova infection on M2<sub>82-90</sub>, M<sub>187-195</sub> and OVA<sub>257-264</sub> specific CD8<sup>+</sup> T cells isolated from adult and neonatal murine lung 7 DPI. Epitope-specific responses were measured with tetramer by flow cytometry. **c** Weights of naïve lungs were measured in order to calculate the IFN $\beta$  dosage used in Figure 4 and Supplemental Fig. 3d and e. **d** Effect of exogenous intranasal IFN $\alpha$  on the expression of CD86 on cDC2 and pDC subsets isolated from the dLN during RSV-ova infection **e** Effect of exogenous intranasal IFN $\beta$  on CD86 expression by cDC2 and pDC subsets isolated from the lung of uninfected neonatal and adult mice 18-20 hours after the intranasal administration of IFN $\beta$  at doses indicated. \*\*p < 0.001, \*p < 0.05, NS = not significant

### Supplemental Figure 4

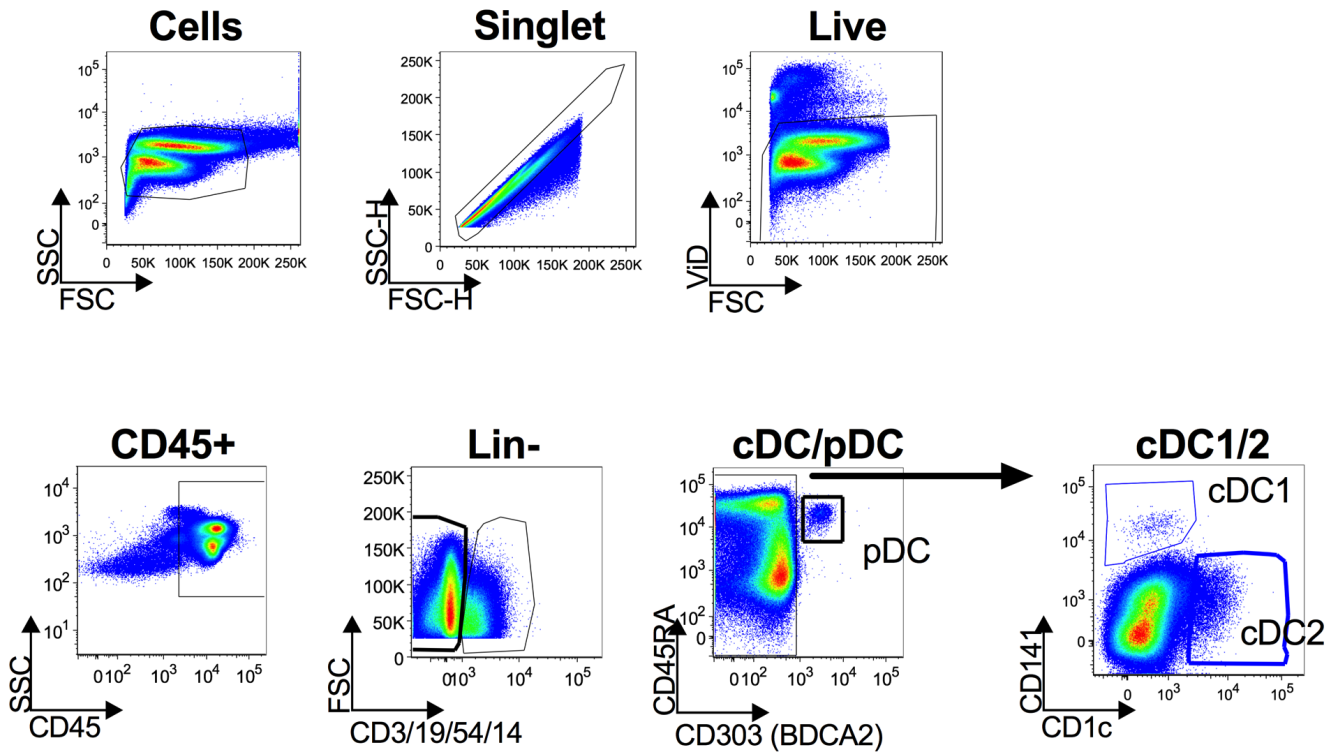

**Supplemental Fig. 4 Gating strategy of human dendritic cell (DC) subsets.** Flow cytometric gating strategy for human DC subsets from mononuclear cells isolated from human adult peripheral blood or umbilical cord blood.

## SUPPLEMENTAL METHODS AND MATERIALS

### Generation of RSV-ova virus

A 1,313 nucleotide (nt) insert containing a 1,289 nt fragment (nt 57 to 1345 of the chicken ovalbumin mRNA, Genbank Accession number V00383.1), framed by RSV gene start (GGGGCAAATA) and gene end signals (AGTTATAAAAAA), was inserted into the “6120” version of an RSV full length cDNA plasmid,<sup>49</sup> using a unique *Stu*I restriction site located in the RSV G/F intergenic region.<sup>50</sup> The “6120” version contains a 112 nt deletion of the 3' noncoding region of the SH gene, and five translationally silent nucleotide changes in the downstream end of the SH open reading frame, designed to stabilize RSV full-length cDNA plasmids during propagation in bacteria, and were deemed to be phenotypically inconsequential.<sup>49</sup> The recombinant RSV-ova virus was generated from cDNA as described previously,<sup>50</sup> and its genomic sequence was confirmed by sequence analysis. In some experiments (**Fig. 3a; Supplemental Fig. 2**), a previous version of RSV-ova was used that contained the complete 3' non-coding region of the RSV SH gene. The genome of this version of RSV-ova was later found to contain a 1,338 transposon sequence derived from *E. coli*, inserted between nucleotides 4,998 and 4,999 of the RSV genome (Genbank Accession number KT992094). Ovalbumin expression was not affected by the presence of the transposon.

### RNA-seq

RNA extraction yielded high RNA integrity numbers (RIN=9). Single-end sequencing with 75-80 million generated reads per sample identified 126,006 genes; 20,259 of which were nonredundant. 397 genes were determined to be differentially expressed between adult and neonatal K<sup>b</sup>-OVA-cDC1s by Welch's t-test followed by multiple testing corrections with Benjamini-Hochberg False Discover Rate (p value <0.055 and fold change >1.5).



SUPPLEMENTAL TABLE 1

| REAGENT or RESOURCE                                                                      | SOURCE                   | IDENTIFIER                          |
|------------------------------------------------------------------------------------------|--------------------------|-------------------------------------|
| <b>Antibodies</b>                                                                        |                          |                                     |
| anti-mouse CD16/32 (clone 2.4G2)                                                         | BD Biosciences           | Cat#553142;<br>RRID:AB_394657       |
| anti-mouse CD24, PerCP/Cy5.5 conjugated (clone M1/69)                                    | BioLegend                | Cat#101824;<br>RRID:AB_1595491      |
| anti-mouse CD24 Antibody, PE/Cy5 conjugated (clone M1/69)                                | BioLegend                | Cat#: 101812;<br>RRID:AB_439714     |
| anti-mouse CD80, FITC conjugated (clone 16-10A1)                                         | BioLegend                | Cat#104706;<br>RRID:AB_313127       |
| anti-mouse CD80, BV421 conjugated (clone 16-10A1)                                        | BioLegend                | Cat#: 104726;<br>RRID:AB_2561445    |
| anti-mouse CD45, PE/Cy7 conjugated (clone 30-F11)                                        | BioLegend                | Cat#103114;<br>RRID:AB_312979       |
| anti-mouse CD40, PE/Cy7 conjugated (clone 3/23)                                          | BioLegend                | Cat#124622;<br>RRID:AB_10897812     |
| anti-mouse CD40, FITC conjugated (clone 3/23)                                            | BioLegend                | Cat# 124608<br>RRID:AB_1134096      |
| anti-mouse CD11b, PE/Cy5 conjugated (clone M1/70)                                        | BioLegend                | Cat#101210;<br>RRID:AB_312793       |
| anti-mouse CD11b, BV785 conjugated (clone M1/70)                                         | BioLegend                | Cat# 101243;<br>RRID:AB_2561373     |
| anti-mouse CD103, PE conjugated (clone 2E7)                                              | BioLegend                | Cat#121406;<br>RRID:AB_1133989      |
| anti-mouse CD86, AlexFluor 700 conjugated (clone GL-1)                                   | BioLegend                | Cat#105024;<br>RRID:AB_493721       |
| anti-mouse CD86, BV605 conjugated (clone GL-1)                                           | BioLegend                | Cat# 105037<br>RRID:AB_11204429     |
| anti-mouse H-2K <sup>b</sup> bound to SIINFEKL, APC conjugated (clone 25-D1.16)          | BioLegend                | Cat#141606<br>RRID:AB_11219595      |
| anti-mouse H-2K <sup>b</sup> bound to SIINFEKL, APC conjugated (clone 25-D1.16)          | Thermo Fisher Scientific | Cat# 17-5743-82;<br>RRID:AB_1311286 |
| anti-mouse H-2K <sup>b</sup> bound to SIINFEKL, biotin conjugated (clone 25-D1.16)       | Thermo Fisher Scientific | Cat# 13-5743-82;<br>RRID:AB_1210600 |
| anti-mouse I-A <sup>b</sup> (A $\beta$ <sup>b</sup> ), biotin conjugated (clone 25-9-17) | BioLegend                | Cat#114403;<br>RRID:AB_313578       |
| anti-mouse I-A/I-E, biotin conjugated (clone M5/114.15.2)                                | BioLegend                | Cat# 107643;<br>RRID:AB_2565976     |
| anti-mouse I-A/I-E, BV711 conjugated (clone M5/114.15.2)                                 | BioLegend                | Cat# 107643<br>RRID:AB_2565976      |
| Brilliant Violet 421 Streptavidin                                                        | BioLegend                | Cat# 405226                         |
| anti-mouse CD11c, Brilliant Violet 785 conjugated (clone N418)                           | BioLegend                | Cat#117336;<br>RRID:AB_2565268      |
| anti-mouse CD11c, PE-eFluor 610 conjugated (clone N418)                                  | Thermo Fisher Scientific | Cat# 61-0114-80;<br>RRID:AB_2574529 |
| anti-mouse CD64 (Fc $\gamma$ RI), Brilliant Violet 711 conjugated (clone X54-5/7.1)      | BioLegend                | Cat#139311;<br>RRID:AB_2563846      |
| anti-mouse CD64 (Fc $\gamma$ RI), Brilliant Violet 605 conjugated (clone X54-5/7.1)      | BioLegend                | Cat# 139323;<br>RRID:AB_2629778     |
| anti-mouse CD197 (CCR7), Brilliant Violet 421 conjugated (clone 4B12)                    | BioLegend                | Cat#120120;<br>RRID:AB_2561446      |

|                                                              |                          |                                     |
|--------------------------------------------------------------|--------------------------|-------------------------------------|
| anti-mouse CD197 (CCR7), PE/Cy5 conjugated (clone 4B12)      | BioLegend                | Cat# 120113<br>RRID:AB_493571       |
| anti-mouse BST2, PE-eFluor 610 conjugated (clone eBio927)    | Thermo Fisher Scientific | Cat#61-3172;<br>RRID:AB_2574603     |
| anti-mouse BST2, PE-Cy7 conjugated (clone eBio927)           | Thermo Fisher Scientific | Cat# 25-3172-82<br>RRID:AB_2573440  |
| anti-mouse CD3e, APC-Cy7 conjugated (clone 145-2C11)         | BD Biosciences           | Cat#557596;<br>RRID:AB_396759       |
| anti-mouse CD3e, BUV395 conjugated (clone 145-2C11)          | BD Biosciences           | Cat# 563565<br>RRID:AB_2738278      |
| anti-mouse CD8a, PE-CF594 conjugated (clone 53-6.7)          | BD Biosciences           | Cat#562283;<br>RRID:AB_11152075     |
| Tetramer- H-2 Kb OVA (SIINFEKL), BV421 conjugated            | MBL International        | Cat#TB-5001-4                       |
| iTAg Tetramer- H-2 Kd RSV M2 (SYIGSINNI), PE conjugated      | MBL International        | Cat# TB-M506-1                      |
| iTAg Tetramer- H-2 Db RSV Tetramer-NAITNAKII, APC conjugated | MBL International        | Cat# TB-5018-2                      |
| anti-mouse CD80 (B7-1) (clone 16-10A1)                       | Bio X Cell               | Cat#BE0024;<br>RRID:AB_1107676      |
| anti-mouse CD86 (B7-2) (clone GL-1)                          | Bio X Cell               | Cat#BE0025;<br>RRID:AB_1107678      |
| anti-mouse CD40 (clone FGK4.5)                               | Bio X Cell               | Cat#BE0016-2<br>RRID:AB_1107647     |
| Armenian Hamster polyclonal IgG                              | Bio X Cell               | Cat#BE0091<br>RRID:AB_1107773       |
| anti-mouse Rat IgG2a (clone 2A3)                             | Bio X Cell               | Cat#BE0089<br>RRID:AB_1107769       |
| anti-human CD14, Al700 conjugated (clone TuK4)               | Thermo Fisher Scientific | Cat# MHCD1429<br>RRID:AB_10373535   |
| anti-human HLA-DR, APC conjugated (clone LN3)                | Thermo Fisher Scientific | Cat# 17-9956-42<br>RRID:AB_10670347 |
| anti-human CD86, PE/Cy5 conjugated (clone IT2.2)             | BioLegend                | Cat# 305408<br>RRID:AB_314528       |
| anti-human CD80, PE conjugated (clone 2D10)                  | BioLegend                | Cat# 305208<br>RRID:AB_314504       |
| anti-human CD1c, BV605 conjugated (clone L161)               | BioLegend                | Cat# 331538<br>RRID:AB_2629762      |
| anti-human CD19, Al700 conjugated (clone HIB19)              | BioLegend                | Cat# 302226<br>RRID:AB_493751       |
| anti-human CD56, Al700 conjugated (clone HCD56)              | BioLegend                | Cat# 318316<br>RRID:AB_604104       |
| anti-human CD141, BV785 conjugated (clone M80)               | BioLegend                | Cat# 344116<br>RRID:AB_2572195      |
| anti-human CD11c, PE/Dazzle 594 conjugated (clone Bu15)      | BioLegend                | Cat# 337228<br>RRID:AB_2564549      |
| anti-human CD45, FITC conjugated (clone HI30)                | BioLegend                | Cat# 304038<br>RRID:AB_2562050      |
| anti-human CD3, Al700 conjugated (clone OKT3)                | BioLegend                | Cat# 317340<br>RRID:AB_2563408      |
| anti-human CD45RA, BV711 conjugated (clone HI100)            | BioLegend                | Cat# 304138<br>RRID:AB_2563815      |
| anti-human CD303/BDCA2, BV421 conjugated (clone 201A)        | BioLegend                | Cat# 354212<br>RRID:AB_2563871      |

| <b>Bacterial and Virus Strains</b>                                                |                          |                                                                                                                                                                                                                                                                               |
|-----------------------------------------------------------------------------------|--------------------------|-------------------------------------------------------------------------------------------------------------------------------------------------------------------------------------------------------------------------------------------------------------------------------|
| RSV A2 (RSV-wt)                                                                   | Barney Graham, NIH       | Propagated in-house                                                                                                                                                                                                                                                           |
| RSV A2 -OVA (RSV-ova)                                                             | Peter Collins, NIH       | Propagated in-house                                                                                                                                                                                                                                                           |
| <b>Biological Samples</b>                                                         |                          |                                                                                                                                                                                                                                                                               |
| Human peripheral blood from adults                                                | VRC, NIH                 |                                                                                                                                                                                                                                                                               |
| Human cord blood                                                                  | WRNMMC                   |                                                                                                                                                                                                                                                                               |
| <b>Chemicals, Peptides, and Recombinant Proteins</b>                              |                          |                                                                                                                                                                                                                                                                               |
| Mouse IFNalpha A                                                                  | PBL Assay Science        | Cat#12100-1                                                                                                                                                                                                                                                                   |
| Mouse IFN beta                                                                    | PBL Assay Science        | Cat#12405-1                                                                                                                                                                                                                                                                   |
| Human IFN beta                                                                    | PBL Assay Science        | Cat# 11415-1                                                                                                                                                                                                                                                                  |
| Vybrant® CFDA SE Cell Tracer Kit                                                  | Invitrogen               | Cat# V12883                                                                                                                                                                                                                                                                   |
| Live/dead Fixable Aqua dead cells stain kit                                       | Thermo Fisher Scientific | Cat# L34957                                                                                                                                                                                                                                                                   |
| Normal Mouse Serum                                                                | Jackson ImmunoResearch   | Cat# 015-000-001<br>RRID:AB_2337186                                                                                                                                                                                                                                           |
| OVA peptide                                                                       | Anaspec                  | Cat# AS-60193                                                                                                                                                                                                                                                                 |
| R848                                                                              | InvivoGen                | Cat# tlr-r848-5                                                                                                                                                                                                                                                               |
| Ficoll-Paque™ PREMIUM                                                             | Fisher Scientific        | Cat# 45-001-751                                                                                                                                                                                                                                                               |
| Fico/Lite-LM (mouse)                                                              | Atlanta Biologicals      | Cat# I40650                                                                                                                                                                                                                                                                   |
| <b>Critical Commercial Assays</b>                                                 |                          |                                                                                                                                                                                                                                                                               |
| Mouse IFNalpha ELISA using:<br>Rat monoclonal anti-Mouse IFN Alpha (Clone RMMA-1) | PBL Assay Science        | Cat#22100-1<br>RRID:AB_358960                                                                                                                                                                                                                                                 |
| Anti-Mouse IFN Alpha Antibody, Rabbit Serum (PAb)                                 | PBL Assay Science        | Cat#32100-1<br>RRID:AB_354242                                                                                                                                                                                                                                                 |
| Anti-Rabbit IgG (H+L), HRP Conjugate                                              | Promega                  | Cat#W4011<br>RRID:AB_430833                                                                                                                                                                                                                                                   |
| Mouse IFN-beta DuoSet ELISA                                                       | R&D Systems              | Cat# DY8234-05                                                                                                                                                                                                                                                                |
| Pierce BCA protein assay kit                                                      | Thermo Fisher Scientific | Cat#23227                                                                                                                                                                                                                                                                     |
| CD8a+ T Cell Isolation Kit, mouse                                                 | Miltenyi Biotec          | Cat# 130-104-075                                                                                                                                                                                                                                                              |
| <b>Experimental Models: Cell Lines</b>                                            |                          |                                                                                                                                                                                                                                                                               |
| HEp2 cell line                                                                    | ATCC                     | Cat# CCL-23<br>RRID:CVCL_1906                                                                                                                                                                                                                                                 |
| <b>Experimental Models: Organisms/Strains</b>                                     |                          |                                                                                                                                                                                                                                                                               |
| Mouse: C57Bl/6J male                                                              | The Jackson Laboratory   | Strain# 000664<br>RRID:IMSR_JAX:000664                                                                                                                                                                                                                                        |
| Mouse: BALB/cJ female                                                             | The Jackson Laboratory   | Strain# 000651<br>RRID:IMSR_JAX:000651                                                                                                                                                                                                                                        |
| Mouse: CB6F1/J female                                                             | The Jackson Laboratory   | Strain# 100007<br>RRID:IMSR_JAX:100007                                                                                                                                                                                                                                        |
| Mouse: OTI mice C56BL/6-Tg(Tcratcrb)1100Mjb/J                                     | The Jackson Laboratory   | Strain# 003831<br>RRID:IMSR_JAX:003831                                                                                                                                                                                                                                        |
| <b>Software and Algorithms</b>                                                    |                          |                                                                                                                                                                                                                                                                               |
| BD FACS DiVa (8)                                                                  | BD Biosciences           | <a href="http://www.bdbiosciences.com/us/instruments/clinical/software/flow-cytometry-acquisition/bd-facsdiva-software/m/333333/overview">http://www.bdbiosciences.com/us/instruments/clinical/software/flow-cytometry-acquisition/bd-facsdiva-software/m/333333/overview</a> |

|               |                 |                                                                                                                                                                 |
|---------------|-----------------|-----------------------------------------------------------------------------------------------------------------------------------------------------------------|
| Flowjo V9.9.6 | Tree Star, Inc. | <a href="https://www.flowjo.com/solutions/flowjo/download_s">https://www.flowjo.com/solutions/flowjo/download_s</a>                                             |
| Prism v7.0    | GraphPad        | <a href="https://www.graphpad.com/demos">https://www.graphpad.com/demos</a>                                                                                     |
| Ingenuity IPA | QIAGEN          | <a href="https://www.qiagenbioinformatics.com/products/ingenuity-pathway-analysis">https://www.qiagenbioinformatics.com/products/ingenuity-pathway-analysis</a> |
